# Supplementary material
Source: Springer Nature journal article supplement (https://www.springermedizin.de/resource/supplementary/12906_2013_1584_MOESM2_ESM.pdf/9522328)

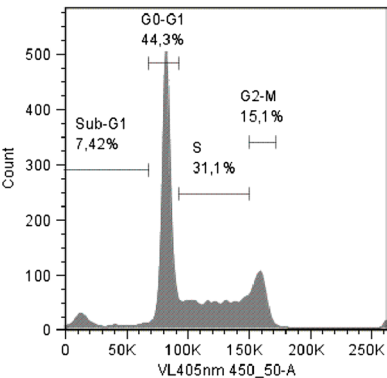

control

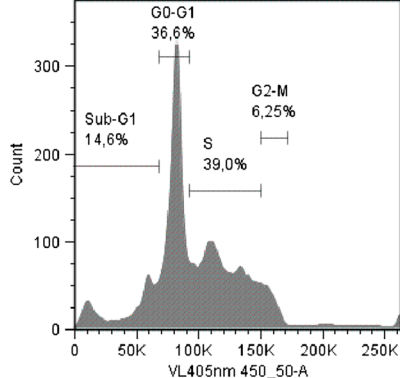

SY177

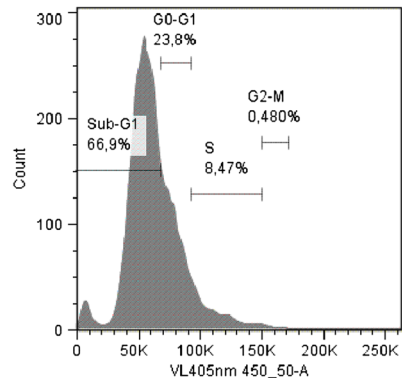

SY179

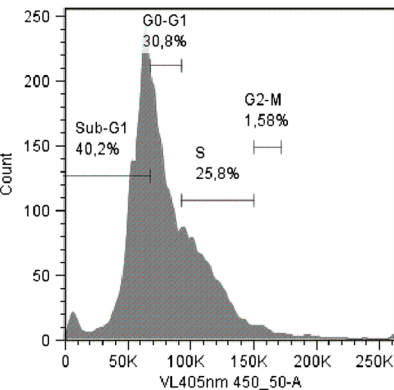

Ach-b

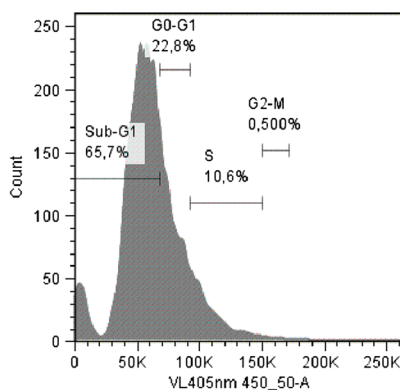

SY160

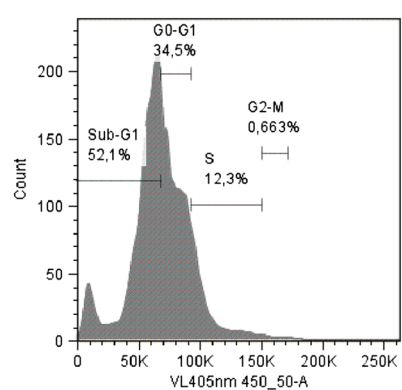

Doxorubicin

Supplement: MOESM2 [file 9522328]
